Xu et al

Alpha 6 Integrins Regulate the Expression of Laminin-511 and CXCR4  
to Promote Endothelial Tubular Morphogenesis

Hao Xu, Kevin Pumiglia and Susan E. LaFlamme\*

Department of Regenerative and Cancer Cell Biology

Albany Medical College

Albany NY 12208

Running Title: Endothelial morphogenesis

Corresponding author: [laflams@amc.edu](mailto:laflams@amc.edu)

Key words: Integrin, laminin, CXCR4, angiogenesis

Xu et al

## Summary statement

Endothelial-secreted laminin-511 and its receptors,  $\alpha 6$  integrins promote tubular morphogenesis by regulating the expression of the chemokine receptor, CXCR4. Additionally, the depletion of  $\alpha 6$  integrins from established tubes results in the loss of tubular integrity and laminin-511 expression.

Xu et al

**Abstract** (180 words)

During angiogenesis, endothelial cells engage components of the extracellular matrix through integrin-mediated adhesion. Endothelial cells express laminin-411 and laminin-511 that bind to integrins, including the  $\alpha 6$  integrins,  $\alpha 6\beta 1$  and  $\alpha 6\beta 4$ . However, little is known about the contribution of these laminins to endothelial tubular morphogenesis and stability. We used two organotypic angiogenesis assays in conjunction with RNAi approaches to demonstrate that endothelial depletion of either the  $\alpha 4$  chain of laminin-411 or the  $\alpha 5$  chain of laminin-511 inhibited sprouting and tube formation. Depletion of  $\alpha 6$  integrins resulted in similar phenotypes. Interestingly, depletion of  $\alpha 6$  integrins also inhibited the expression of laminin-511, which correlated with the loss of tubular stability. Loss of either  $\alpha 6$  integrins or laminin-511 resulted in the inhibition of the expression of CXCR4, a gene previously associated with sprouting endothelial cells. Pharmacological inhibition of CXCR4 signaling suppressed endothelial sprouting and morphogenesis, suggesting that  $\alpha 6$  integrins and laminin-511 promotes endothelial tubular morphogenesis in part by regulating the expression of CXCR4. Taken together, our results suggest that  $\alpha 6$  integrins regulate gene expression to promote both early events in tubular morphogenesis, as well as the stability of established endothelial tubes.

## Introduction

Angiogenesis is a process by which new vessels sprout from pre-existing vasculature, anastomose with neighboring sprouts to form new networks, which then remodel and mature (Carmeliet, 2003). Angiogenesis contributes to both normal and pathological processes, including tissue repair, tumor progression, and inflammation (Carmeliet, 2005). Thus, understanding the mechanisms that regulate various aspects of this process remains an important objective.

Endothelial cells interact with components of the extracellular matrix (ECM), including fibronectin, to promote early stages of angiogenesis, whereas the binding of endothelial cells to components of the basement membrane, such as laminin, contributes to vessel stability (Song et al., 2017; Thyboll et al., 2002). Although endothelial cells can adhere to ECM components provided by other cell types, such as those present in the provisional matrix that is formed during tissue repair (Eming et al., 2007), endothelial cells themselves secrete both ECM and basement membrane components, including fibronectin and laminins (Hallmann et al., 2005; Turner et al., 2017).

Laminins are heterotrimeric proteins, containing  $\alpha$ ,  $\beta$  and  $\gamma$  chains (Yurchenco, 2011). Endothelial cells express laminin-411, which contains the  $\alpha 4$ ,  $\beta 1$  and  $\gamma 1$  chains and laminin-511, which contains the  $\alpha 5$ ,  $\beta 1$  and  $\gamma 1$  chains (Hallmann et al., 2005). Current data suggests that these laminins support vessel stability. The global deletion of the laminin- $\alpha 4$  (Lm-  $\alpha 4$ ) chain resulted in embryonic hemorrhaging (Thyboll et al., 2002), whereas the endothelial-specific deletion of Lm-  $\alpha 5$  chain reduced endothelial barrier function (Song et al., 2017). Both of these phenotypes suggest that these laminin isoforms promote vessel stability; however, whether these laminins are required for endothelial tubular morphogenesis has not been examined.

Integrins are  $\alpha/\beta$  heterodimeric receptors that bind to ECM proteins and components of the basement membrane, including laminins, to mediate adhesion and to activate signaling pathways that cooperate with growth factor receptors to regulate cell behavior (Danen and Sonnenberg, 2003; Streuli and Akhtar, 2009). Endothelial cells express several integrin heterodimers that allow their interaction with components of the extracellular matrix including fibronectin and collagen, as well as laminins present in the endothelial basement membrane (Avraamides et al., 2008; Davis and Senger, 2005). Our current study focuses on determining whether laminin-411 and laminin-511 and their integrin receptors,  $\alpha 6$  integrins ( $\alpha 6\beta 1$  and  $\alpha 6\beta 4$ ) contribute to early steps in endothelial tubular morphogenesis (Hallmann et al., 2005; Kortessmaa et al., 2000).

Xu et al

Other labs have previously analyzed the role of  $\alpha 6$  integrins in angiogenesis. Mice with the Tie 1-dependent endothelial deletion of the  $\alpha 6$  integrin subunit showed that the depletion of  $\alpha 6$  integrins promoted angiogenesis (Germain et al., 2010), presumably due in part to the reduced association of endothelial cells with their underlying basement membrane. Interestingly, the Tie 2-dependent endothelial deletion of  $\alpha 6$  integrins resulted in reduced angiogenesis; this was explained by the loss of  $\alpha 6$  integrins on endothelial progenitor cells and Tie-2 expressing macrophages (Bouvard et al., 2010; Bouvard et al., 2014). Notably, *in vitro* and explant angiogenesis assays demonstrated a requirement for  $\alpha 6$  integrins; however, this requirement was dependent upon the ECM microenvironment (Bouvard et al., 2010; Bouvard et al., 2014; Lee et al., 2006; Primo et al., 2010; Samarelli et al., 2014).

The onset of angiogenesis requires the disruption of stable interactions of endothelial cells with their basement membrane. Thus, to isolate the contribution of laminins and their integrin receptors to early steps in endothelial tubular morphogenesis, we used two organotypic co-culture models that do not require the destabilization of existing tubes. We asked whether the endothelial expression of laminin-411 and/or laminin-511 is required for endothelial tubular morphogenesis, and if so, whether  $\alpha 6$  integrins were also required. Our data demonstrate that depleting endothelial cells of the LM- $\alpha 4$  chain, the LM- $\alpha 5$  chain, or the integrin  $\alpha 6$  subunit inhibits endothelial morphogenesis. This is the first report demonstrating that endothelial-secreted laminins can contribute to this process. Additionally we show that the expression of laminin-511 and  $\alpha 6$  integrins regulate the expression of the proangiogenic gene CXCR4 (Salcedo and Oppenheim, 2003; Salvucci et al., 2002; Tachibana et al., 1998; Unoki et al., 2010). Furthermore, the pharmacological inhibition of CXCR4 impairs tubulogenesis demonstrating that the regulation of CXCR4 by  $\alpha 6$  integrins and laminin-511 contributes to tubular morphogenesis. Lastly, we show that  $\alpha 6$  integrins regulate the stability of endothelial tubes at least in part by regulating the expression of the  $\alpha 5$  chain of laminin-511. Taken together, our data suggests that the interaction of  $\alpha 6$  integrins and laminin-511 contributes to angiogenesis by regulating the expression of CXCR4 in early stages of endothelial morphogenesis, and that once tubes have formed the interaction of  $\alpha 6$  integrins and laminin-511 promotes the stability of endothelial tubes.

## Results

### Endothelial laminins regulate endothelial tubulogenesis

To examine the contribution of endothelial laminin-411 and laminin-511 in tubular morphogenesis, we employed RNAi technology in conjunction with two organotypic angiogenesis assays: the planar co-culture model and the bead sprout assay. In the planar co-culture model, human endothelial cells (HUVECs) are plated at very low density on a confluent layer of human dermal fibroblasts (Bishop et al., 1999). Endothelial cells then proliferate and migrate to form cell trains/cords, which then form lumenized tubes over time (Bishop et al., 1999; Mavria et al., 2006). In the bead sprout assay, endothelial cells are adhered to cytodex beads and embedded in a fibrin gel, which is then covered with a confluent layer of human dermal fibroblasts. Endothelial cells sprout out from the beads into the fibril gel and form lumenized tubes over time (Nakatsu and Hughes, 2008; Nakatsu et al., 2003). Importantly, endothelial cells express laminin-411 and laminin-511 in addition to Col IV in both organotypic models as demonstrated by immunofluorescence microscopy (Fig. 1A-B)

To determine whether the expression of either laminin-411 or laminin-511 was necessary for endothelial morphogenesis, we inhibited their expression with siRNA targeting either the  $\alpha 4$  chain of laminin-411 or the  $\alpha 5$  chain of laminin-511. Data was analyzed from three independent experiments. The efficiency of knockdown in each experiment was determined by qPCR (Fig. 1C-D). Interestingly, knockdown of either LM- $\alpha 5$  or  $\alpha 4$  chains caused defective endothelial morphogenesis in planar co-culture with a more dramatic phenotype resulting from inhibiting the expression of the  $\alpha 5$  chain (Fig. 1E-F). Quantitation of the lengths of cell trains/cords formed after two days showed a mean length of 340  $\mu\text{m}$  in control, whereas depletion of either the Lm- $\alpha 4$  or  $\alpha 5$  chain resulted in an average length of 175  $\mu\text{m}$  and 95  $\mu\text{m}$ , respectively. Similarly, depletion of either laminin chain inhibited sprouting in the bead-sprout assay (Fig. 1G-I). Both the number and lengths of sprouts were decreased (Fig. 1H-I). Our data indicate that both laminin-411 and laminin-511 contribute to endothelial sprouting and tube formation and that the expression of one isoform cannot compensate for the loss of the other suggesting that each laminin isoform may play distinct role during tubular morphogenesis.

### Endothelial $\alpha 6$ integrins promote tubular morphogenesis

Since  $\alpha 6$  integrins have been shown to bind to both laminin-411 and laminin-511 (Kortesmaa et al., 2000), we were interested to test the requirement for  $\alpha 6$  integrins in our organotypic models and to determine whether depletion of  $\alpha 6$  integrins phenocopied the loss of laminin-411 or

laminin-511. As expected, endothelial cells express  $\alpha 6$  integrins in co-culture (Fig. 2A). To determine the effect of depleting endothelial cells of  $\alpha 6$  integrins, we employed lentiviral vectors for the doxycycline inducible expression of a non-targeting shRNA or shRNAs targeting the integrin  $\alpha 6$  subunit. Induction of these shRNAs results in the co-expression of a GFP reporter. Endothelial cells were transduced with these lentiviral vectors and the expression of shRNAs was induced by the addition of doxycycline. Effects of  $\alpha 6$  depletion on endothelial morphogenesis in the planar co-culture were analyzed in three independent experiments. The efficiency of knockdown from these experiments was analyzed by western blot (Fig. 2B, left panel). Effects on endothelial cord/tube length were quantified every two days for a total of 10 days (Fig. 2B, middle panel). Images of representative co-cultures at day 6 are shown in Figure 2B (right panel). Taken together, the data show that morphogenesis is inhibited by day 2 and remained suppressed with very little lengthening of individual endothelial cords in the  $\alpha 6$ -depleted condition at day 10. Similar results were obtained with two additional shRNA targeting sequences (Supplemental Fig. 1).

The depletion of  $\alpha 6$  integrins had a similar inhibitory effect in the bead sprout assay (Fig. 2C). Data was obtained from three independent experiments in which  $\alpha 6$  expression was inhibited by the induction of  $\alpha 6$  targeting shRNA (Fig. 2C, left panel). Measurements of sprout length overtime revealed that endothelial sprouting remained inhibited throughout the 8-day assay (Fig. 2C, middle panel). Images of representative bead sprouts formed at day 8 by control and  $\alpha 6$  depleted endothelial cells are shown in Fig. 2C (right panel). The depletion of  $\alpha 6$  integrins phenocopies the depletion of the LM- $\alpha 5$  chain and LM- $\alpha 4$  chain, suggesting that the interaction between  $\alpha 6$  integrins and laminins secreted by endothelial cells is crucial for tubular morphogenesis.

### **The expression of $\alpha 6$ integrins promotes endothelial tube integrity**

Given our results that  $\alpha 6$  integrins are required for tubulogenesis in our organotypic assays, we asked whether these integrins are also required for the stability of established tubes. To accomplish this, planar co-cultures were set up with endothelial cells that were transduced with lentiviruses carrying either  $\alpha 6$ -targeting or non-targeting shRNAs. Co-cultures were incubated in the absence of doxycycline for 10 days at which time normal endothelial tubes were well established. Co-cultures were then treated with doxycycline to induce the expression of non-targeting or  $\alpha 6$ -targeting shRNAs and imaged after 8 and 12 days of doxycycline treatment. Endothelial tubes expressing  $\alpha 6$  shRNA progressively became destabilized over time (Fig. 3A), which was quantified as changes in the morphology of endothelial structures (Fig. 3B).

## **Alpha-6 integrins regulate the expression of laminin-511**

Since laminin-411 and laminin-511 have been associated with vessel maturation and stability, we asked whether the loss of endothelial tube integrity after the depletion of  $\alpha 6$  integrins was accompanied by changes in the expression of these laminins. We examined the expression of the  $\alpha 5$  and  $\alpha 4$  laminin chains in planar co-culture assays in which we induced the expression of either non-targeting or  $\alpha 6$  targeting shRNAs after the formation of tubes as described in Figure 3A. Our results indicate that the expression of the  $\alpha 5$  chain of laminin-511 is lost after the depletion of  $\alpha 6$  integrins (Fig. 3C). In contrast, the LM  $\alpha 4$  chain is still expressed, but appears diffuse compared to control (Fig. 3C). The loss of laminin-511 may in part be due to decreased levels of LM- $\alpha 5$  RNA (Fig. 4A). These results suggest that  $\alpha 6$  integrins and laminin-511 promote endothelial tube integrity.

## **Laminin-511 and $\alpha 6$ integrins regulate the expression of the pro-angiogenic genes CXCR4 and ANGPT2**

To gain further insight into the mechanisms by which endothelial laminins and  $\alpha 6$  integrins regulate tubular morphogenesis, we asked whether laminin-511 and  $\alpha 6$  integrins regulate the same set of angiogenesis-associated genes. Since depleting endothelial cells of laminin-411 also inhibited sprouting, we tested whether expression of the same or a distinct set of genes was affected. We focused on the expression of genes previously associated with sprouting angiogenesis. These include VEGFR2, CXCR4, ANGPT2, DII4, PDGFB, NRP1, JAG1, and MMP14 (De Smet et al., 2009; del Toro et al., 2010; Strasser et al., 2010). RNA was isolated from non-targeting and  $\alpha 6$  targeting shRNA expressing endothelial cells and gene expression was analyzed by qPCR. Interestingly, depletion of either laminin-511 or  $\alpha 6$  integrins led to significant decreases in RNA transcripts for CXCR4 and ANGPT2 (Fig. 4A&C). Depleting endothelial cells of laminin-411 had little effect on the expression of these genes (Fig. 4B).

## **CXCR4 signaling is required for endothelial tubular morphogenesis**

Since the best characterized mechanism of action for angiopoietin-2, the product of the ANGPT2 gene, is to antagonize the effects of angiopoietin-1 secreted by neighboring mural cells (Carmeliet and Jain, 2011), we did not analyze the contribution of ANGPT2 expression in our model. However, we did analyze the contribution of the chemokine receptor, CXCR4 to endothelial morphogenesis in our organotypic models. CXCR4 has been previously implicated in vascular development and angiogenesis (Salcedo and Oppenheim, 2003; Salvucci et al.,



Xu et al

2002; Tachibana et al., 1998; Unoki et al., 2010). Stromal-derived factor-1 (SDF-1) is a ligand for CXCR4, and both endothelial cells (Salvucci et al., 2002) and fibroblasts (Nagasawa, 2014; Quan et al., 2015) express SDF-1. Thus, it seemed possible that CXCR4 signaling is required downstream of  $\alpha 6$  integrins and laminin-511 for endothelial tubular morphogenesis. To test this possibility, we used the pharmacological inhibitor AMD3100, which blocks CXCR4 activity (Hatse et al., 2002 65; Kalatskaya et al., 2009). In dose response experiments, AMD3100 inhibited both the number and length of sprouts (Fig. 5A). Significant effects on sprout numbers were observed at 500 nM, whereas sprout length was inhibited at concentrations as low as 100 nM (Fig. 5A). Similarly, endothelial morphogenesis was inhibited in planar co-culture assays in a dose-dependent manner with significant inhibition starting at 100 nM of the inhibitor (Fig. 5B). These data suggest that laminin-511 and  $\alpha 6$  integrins regulate CXCR4 expression to promote endothelial tubular morphogenesis.

## Discussion

We used two organotypic co-culture models to demonstrate (1) that the endothelial expression of laminin-411, laminin-511, and  $\alpha 6$  integrins is required for tubular morphogenesis; (2) that  $\alpha 6$  integrins regulate the expression of laminin-511; (3) that laminin-511 and  $\alpha 6$  integrins regulate the expression of CXCR4 and ANGPT2; and (4) that CXCR4 signaling is a critical component in the  $\alpha 6$ /laminin-511 morphogenesis response.

Several matrix proteins and integrin heterodimers can promote endothelial morphogenesis and angiogenesis (Avraamides et al., 2008; Hynes, 2007; Senger and Davis, 2011). The contribution of specific matrix proteins and integrins are context-dependent. Cell culture and aortic ring explant cultures have been employed to examine the role of  $\alpha 6$  integrins in tubular morphogenesis and new vessel growth. Alpha-6 integrins were required when these assays were performed in Matrigel, which is rich in laminin-111, a ligand for  $\alpha 6$  integrins (Bouvard et al., 2012; Primo et al., 2010). However, in collagen gels,  $\alpha 6$  integrins were not required (Bouvard et al., 2012; Primo et al., 2010). These findings suggest that the composition of the ECM microenvironment can dictate usage of specific integrin heterodimers. However, endothelial cells can secrete fibronectin, and endothelial expressed fibronectin and the  $\alpha v\beta 3$  and  $\alpha 5\beta 1$  fibronectin-binding integrins are essential for developmental retinal angiogenesis (Turner et al., 2017). It is not clear why fibronectin expressed by endothelial cells does not override the requirement for  $\alpha 6$  integrins in assays performed in Matrigel. It is possible that the ECM components present in the microenvironment together with the available angiogenic and other growth factors dictate the role or regulate the expression of endothelial-secreted fibronectin, suggesting that the contribution of endothelial fibronectin is context-dependent. This is supported by the finding that endothelial expressed fibronectin and its integrin receptors are not required for tumor angiogenesis (Murphy et al., 2015). Similarly, the reliance of  $\alpha 6$  integrins and endothelial-secreted laminin may also be context dependent. Both organotypic models present an ECM microenvironment similar to that observed in wounds (Eming et al., 2007). In the planar co-culture assay, there is a well-established fibronectin matrix secreted by fibroblasts, and the bead sprout assay is performed in fibrin gels. The reliance of  $\alpha 6$  integrins and endothelial-secreted laminins could be due to a combination of the available matrix proteins and the growth factor milieu present in these assays.

We analyzed the expression of a number of genes that are regulated during angiogenesis, some of which are enriched in tips cells of sprouting vessels (De Smet et al., 2009; del Toro et al., 2010; Strasser et al., 2010). The expression of the majority of genes interrogated did not change upon depletion of either the LM- $\alpha 5$  chain or the integrin  $\alpha 6$  subunit. However, the levels

Xu et al

of both CXCR4 and ANGPT2 were reduced upon the depletion of either  $\alpha 6$  integrins or the LM- $\alpha 5$  chain, suggesting that  $\alpha 6$  integrins and LM-511 promotes their expression. Both the global and endothelial specific knockout of CXCR4 resulted in defects in vascularization (Ara et al., 2005). In our models, we demonstrated that tubular morphogenesis is regulated by CXCR4, whose expression is regulated by  $\alpha 6$  integrins and laminin-511. It is possible that CXCR4 signaling is a major regulator of endothelial morphogenesis in these models; thus, the dependence on  $\alpha 6$  integrins and laminin-511.

Our results also show that  $\alpha 6$  integrins promote the expression of laminin-511 at least partially through regulation of LM- $\alpha 5$  RNA. Furthermore, the loss of  $\alpha 6$  integrins and the concomitant loss of laminin-511 in established endothelial tubes resulted in the loss of their structural integrity, suggesting that  $\alpha 6$  integrins and laminin-511 contribute to vessel stability. This is consistent with *in vivo* data discussed above demonstrating that the loss of expression of  $\alpha 6$  integrins in endothelial cells enhances tumor angiogenesis.

In contrast to the depletion of laminin-511, there was no overlap between the genes regulated by loss of expression of the laminin-411 and the loss of  $\alpha 6$  integrins. We anticipated the down regulation of the Notch ligand, DLL4 upon LM- $\alpha 4$  depletion, as previous studies demonstrated that DLL4 expression is down regulated in LM- $\alpha 4$  null mice during developmental retinal angiogenesis (Stenzel et al., 2011). We also did not observe an obvious connection between laminin-411 expression and the expression of  $\alpha 6$  integrins, suggesting that another integrin heterodimer engages laminin-411 to promote endothelial morphogenesis. The  $\alpha 2\beta 1$  integrin is a potential contributor as previous *in vitro* studies demonstrated that  $\alpha 2\beta 1$  plays a central role in endothelial cell adhesion to laminin-411 (Stenzel et al., 2011).

In summary, the characterization of the contributions of laminins and  $\alpha 6$  laminin-binding integrins during angiogenesis in the adult is complicated by their roles in maintaining vessel integrity (Miner et al., 1998; Thyboll et al., 2002; Turner et al., 2017). We were able to analyze the role of endothelial-expressed laminins in early steps in tubular morphogenesis in the planar co-culture and bead sprout assays, as endothelial morphogenesis in these models does not require the disruption of established endothelial tubes. Our data support the conclusion that  $\alpha 6$  integrins and laminin-511 positively regulates the expression of CXCR4 to promote early events in tubular morphogenesis and also protects the integrity of established endothelial tubes.

## Materials and methods

### Cell Culture

Xu et al

Human umbilical vein endothelial cells (HUVECs) were from Lonza (Allendale, NJ) and were cultured in EGM-2 (Lonza, CC-3162). Adult human dermal fibroblasts (HDFs) were isolated and characterized as previously described {Varney, 2016 #54; Zheng, 2019 #55} and generously provided by the Van De Water laboratory (Albany Medical College). Human embryonic kidney epithelial 293FT cells (HEK293FT) were a kind gift from Dr. Alejandro Pablo Adam lab (AMC). HDFs and HEK293FT cells were cultured in DMEM (Sigma D6429) containing 10% FBS (Atlanta Biologicals), 100 units/ml penicillin (Life Technologies), 100 µg/ml streptomycin (Life Technologies), and 2.92 µg/ml L-glutamine (GE LifeSciences). All cells were cultured at 37°C in 5% CO<sub>2</sub>.

### **Antibodies and Reagents**

Antibodies used in the study are from the following sources. Mouse monoclonal antibody to CD31 (JC70A) was from Dako (Santa Clara, CA). Rabbit polyclonal antibody to CD31 (M-20) was from Santa Cruz Biotechnology Inc. (Santa Cruz, CA). FITC-conjugated UEA lectin (L9006) was from Sigma Aldrich (St. Louis, MO). Rat monoclonal to the α6 integrin subunit (GoH3) was from BD Biosciences (Billerica, MA). Rabbit polyclonal antibody to Collagen IV (ab6586), rabbit polyclonal antibody to laminin-111 (ab11575), mouse monoclonal antibody to the laminin α4 chain (ab205568), and mouse monoclonal antibody to the laminin α5 chain (ab77175) were from Abcam (Cambridge, MA). Donkey anti-rat IgG Alexa Fluor 488 (A21208), donkey anti-mouse IgG Alexa Fluor 488 (A21202), donkey anti-mouse IgG Alexa Fluor 568 (A10037), and goat anti-rabbit IgG Alexa Fluor 488 (A11034) were from ThermoFisher Scientific (Waltham, MA).

### **siRNA**

HUVECs were plated in 6-well tissue culture plates and transfected with siRNA at a 50 nM concentration with RNAiMAX (ThermoFisher) using the protocol provided by the manufacturer. HUVECs transfected with siRNA were assayed for knockdown and used in planar co-cultures (described below) 48 h after transfection. HUVECs transfected with siRNA and used in bead sprout assays (described below) were transfected during bead coating and assayed for knockdown at the end of experiment. siRNAs targeting were purchased from Sigma Aldrich (St. Louis, MO). The non-targeting control was MISSION siRNA Universal Negative Control #1 (SIC001). The nucleotide sequences of targeting siRNAs are as follows: laminin α4 chain (5'-GCAGAATCCTGCTATAGGA-3'), laminin α5 chain (5'-CTGATCACCTGCACGGGCA-3'), and the integrin α6 subunit (5'-GGATTGTTCGTGTAGAGCA-3').

Xu et al

## Inducible shRNA

Doxycycline-inducible lentiviral (SMART) vectors harboring shRNAs targeting the  $\alpha 6$  integrin subunit or a non-targeting (NT) shRNA were purchased from Dharmacon (Lafayette, CO). Lentiviruses were produced by co-transfection of HEK293FT cells with the shRNA expression vector together with the packaging plasmid, psPAX2, coding for Gag, Pol, Rev, Tat (#12260, Addgene), and the envelope plasmid, pMD2.G, coding for VSV-G (#12259, Addgene). HUVECs were transduced with filtered viral supernatant plus 8  $\mu$ g/ml polybrene. Cells were induced with doxycycline (100 ng/ml) for 48 h prior to adding HUVECs to co-cultures or in some experiments after 10 days in co-culture as described below. The nucleotide sequences of the shRNAs are as follows: NT (5'-TGGTTTACATGTTGTGTGA-3'),  $\alpha 6$  targeting sequence 1 (5'-AAAACCACGGCTCCACTGT-3'),  $\alpha 6$  targeting sequence 2 (5'-CTCCATGCACACTTTCTGT-3'), and  $\alpha 6$  targeting sequence 3 (5'-AACTCGATCCGCGTGCATG-3').

## Quantitative PCR (qPCR)

TRIzol (ThermoFisher) was used to isolate RNA from siRNA transfected HUVECs, as well as, shRNA expressing HUVECs. Extraction of RNA from bead sprout assays (described below) using TRIzol was performed after the removal of HDFs with trypsin-EDTA Solution 10X (59418C, Sigma). cDNA was synthesized with iScript Reverse Transcription Supermix (BioRad) using 1  $\mu$ g of RNA. Equal amounts of cDNA were used in qPCR reactions performed with iQ SYBR Green Supermix (BioRad). The nucleotide sequences of the qPCR primers used are listed in Table 1.

## Western blotting

Western blotting was used to confirm RNAi induced knockdown. Cells were lysed in mRIPA buffer (50 mM Tris pH 7.4, 1% NP-40, 0.25% Na Deoxycholate, 150 mM NaCl, 1 mM EDTA) containing both phosphatase (Sigma, #4906837001) and protease inhibitor cocktails (ThermoFisher, 78440). Equal amounts of protein (20 to 40  $\mu$ g) were separated by SDS-PAGE and transferred to nitrocellulose for antibody probing. Imaging was performed with a ChemiDoc XRS+ (BioRad) and quantitation with Image Lab (BioRad).

## Organotypic culture assays

Planar co-culture: As one organotypic culture, we utilized the planar co-culture model developed by Bishop and colleagues (Bishop et al., 1999) and modified by the Pumiglia lab (Bajaj et al.,

Xu et al

2012). This model reconstitutes some of the complex interactions that occur during angiogenesis among endothelial cells, the ECM and supporting cells. HDFs were seeded in tissue cultures dishes ± glass coverslips and cultured to confluence. The medium was changed to EGM-2. HUVECs, expressing targeting or non-targeting RNAi, were then seeded 16 h later at a density of 20,000 cells per 9 cm<sup>2</sup> and cultured up to 10 days. ShRNA-mediated knockdown in pre-formed tubes was accomplished by culturing HUVECs expressing doxycycline-inducible lentiviral (SMART) vectors on HDFs for 10 days, in the absence of doxycycline with medium changed every 48 h. Doxycycline was then introduced on day 11, at a concentration of 100 ng/ml and refreshed every 48 h for up to 16 days. Endothelial morphogenesis and changes in tube structure were analyzed by immunofluorescence microscopy.

**Bead sprout assay:** To study endothelial sprouting, we employed the bead sprout assay as described by Nakatsu and Hughes (Nakatsu and Hughes, 2008). Cytodex 3 beads (GE) were coated at ~1000 HUVECs per bead inside of a 2 ml microcentrifuge tube for 4 h at 37°C, mixing gently by inverting the tubes every 20 min and transferred to a T25 flask and incubated at 37°C, overnight. Beads were then washed 3X with EGM-2 medium and re-suspended in PBS containing 3 mg/ml of fibrinogen (Sigma, #F8630) and 0.15 U/ml of aprotinin (Sigma, #A6279). Thrombin (Sigma, #T4648) was added at a final concentration of 0.125 U/ml and the mixture was plated in wells of an 8-well slide (Corning, #3-35411). The mixture was allowed to clot for 30 min at 37°C. HDFs were then added to the top surface of the fibrin gel in EGM-2 medium at a concentration of 30,000 cells per well. The formation of sprouts and sprout lengths were assayed by either immunofluorescence or phase contrast microscopy.

### **Immunofluorescence Microscopy**

Cells were fixed cells with 4% PFA (Electron Microscopy Sciences) for 15 min, permeabilized with 0.5% Triton X-100 in PBS for 15 min, and then blocked with 2% BSA in PBST for 1 h at RT. Antibodies were diluted in 2% BSA in PBST and incubated with cells overnight at 4°C. Samples were then washed 4X with PBST at RT over the course of 4 h, and then incubated for 1 h with the appropriate secondary antibodies (1:1000 dilution). Following secondary antibody staining, samples were washed 3X with PBST at RT for 1 h and mounted with SlowFade Gold antifade reagent (ThermoFisher). Samples were analyzed using a Nikon inverted TE2000-E microscope equipped with phase contrast and epifluorescence, a digital CoolSNAP HQ camera, a Prior ProScanII motorized stage and a Nikon C1 confocal system and EZC1 and NIS-Elements acquisition software. Images were acquired with Plan Fluor 4X/0.13, Plan Fluor 10X/0.30, Plan

Xu et al

Fluor ELWD 20X/0.45, Plan Apo 40X/1.0 oil, and Plan Apo 100X/1.4 oil objectives and analyzed with either NIS elements (Nikon) or IMARIS software as indicated. Contrast and/or brightness were adjusted for some images to assist in visualization.

### **Image analysis**

For planar co-cultures, were endothelial cells initially form cell trains/cord, which mature into endothelial tubes, cord/tube lengths in planar co-cultures were measured by tracing tubes within each field using NIS Elements (Nikon). Any tubes that extend beyond the field were excluded from analysis. Tube widths in planar co-cultures were calculated with AngioTool (NIH) by dividing total tube area by total tube lengths per field. Sprout lengths in bead sprout assays were measured by tracing each sprout using NIS elements (Nikon) and sprouts per bead were counted manually.

### **Statistical analysis**

Statistical analysis was performed with GraphPad Prism software using Student's t-test or one-way ANOVA. P value of  $p < 0.05$  was considered to be statistically significant.

### **Acknowledgements**

The authors thank Drs. Livingston Van De Water and C Michael DiPersio for critically reading this manuscript, Dr. Van De Water for providing human adult dermal fibroblasts, and Debbie Moran for assistance in the preparation of the figures.

### **Competing interests**

No competing interests declared.

### **Funding**

This work was supported by Institutional seed funds to SEL and by funding from the David E Bryant Foundation to KP

### **Data availability**

All reagents generated in this study will be made available upon request.



Xu et al

# References

- Ara, T., K. Tokoyoda, R. Okamoto, P.A. Koni, and T. Nagasawa. 2005. The role of CXCL12 in the organ-specific process of artery formation. *Blood*. 105:3155-3161.
- Avraamides, C.J., B. Garmy-Susini, and J.A. Varner. 2008. Integrins in angiogenesis and lymphangiogenesis. *Nat Rev Cancer*. 8:604-617.
- Bajaj, A., Q.F. Li, Q. Zheng, and K. Pumiglia. 2012. Loss of NF1 expression in human endothelial cells promotes autonomous proliferation and altered vascular morphogenesis. *PLoS One*. 7:e49222.
- Bishop, E.T., G.T. Bell, S. Bloor, I.J. Broom, N.F. Hendry, and D.N. Wheatley. 1999. An in vitro model of angiogenesis: basic features. *Angiogenesis*. 3:335-344.
- Bouvard, C., A. De Arcangelis, B. Dizier, I. Galy-Fauroux, A.M. Fischer, E. Georges-Labouesse, and D. Helley. 2012. Tie2-dependent knockout of alpha6 integrin subunit in mice reduces post-ischaemic angiogenesis. *Cardiovasc Res*. 95:39-47.
- Bouvard, C., B. Gafsou, B. Dizier, I. Galy-Fauroux, A. Lokajczyk, C. Boisson-Vidal, A.M. Fischer, and D. Helley. 2010. alpha6-integrin subunit plays a major role in the proangiogenic properties of endothelial progenitor cells. *Arterioscler Thromb Vasc Biol*. 30:1569-1575.
- Bouvard, C., Z. Segaula, A. De Arcangelis, I. Galy-Fauroux, L. Mauge, A.M. Fischer, E. Georges-Labouesse, and D. Helley. 2014. Tie2-dependent deletion of alpha6 integrin subunit in mice reduces tumor growth and angiogenesis. *Int J Oncol*. 45:2058-2064.
- Carmeliet, P. 2003. Angiogenesis in health and disease. *Nat Med*. 9:653-660.
- Carmeliet, P. 2005. Angiogenesis in life, disease and medicine. *Nature*. 438:932-936.
- Carmeliet, P., and R.K. Jain. 2011. Molecular mechanisms and clinical applications of angiogenesis. *Nature*. 473:298-307.
- Danen, E.H., and A. Sonnenberg. 2003. Integrins in regulation of tissue development and function. *J Pathol*. 201:632-641.
- Davis, G.E., and D.R. Senger. 2005. Endothelial extracellular matrix: biosynthesis, remodeling, and functions during vascular morphogenesis and neovessel stabilization. *Circ Res*. 97:1093-1107.
- De Smet, F., I. Segura, K. De Bock, P.J. Hohensinner, and P. Carmeliet. 2009. Mechanisms of vessel branching: filopodia on endothelial tip cells lead the way. *Arterioscler Thromb Vasc Biol*. 29:639-649.



Xu et al

del Toro, R., C. Prahst, T. Mathivet, G. Siegfried, J.S. Kaminker, B. Larrivee, C. Breant, A. Duarte, N. Takakura, A. Fukamizu, J. Penninger, and A. Eichmann. 2010. Identification and functional analysis of endothelial tip cell-enriched genes. *Blood*. 116:4025-4033.

Eming, S.A., B. Brachvogel, T. Odorisio, and M. Koch. 2007. Regulation of angiogenesis: wound healing as a model. *Prog Histochem Cytochem*. 42:115-170.

Germain, M., A. De Arcangelis, S.D. Robinson, M. Baker, B. Tavora, G. D'Amico, R. Silva, V. Kostourou, L.E. Reynolds, A. Watson, J.L. Jones, E. Georges-Labouesse, and K. Hodivala-Dilke. 2010. Genetic ablation of the alpha 6-integrin subunit in Tie1Cre mice enhances tumour angiogenesis. *J Pathol*. 220:370-381.

Hallmann, R., N. Horn, M. Selg, O. Wendler, F. Pausch, and L.M. Sorokin. 2005. Expression and function of laminins in the embryonic and mature vasculature. *Physiol Rev*. 85:979-1000.

Hatse, S., K. Princen, G. Bridger, E. De Clercq, and D. Schols. 2002. Chemokine receptor inhibition by AMD3100 is strictly confined to CXCR4. *FEBS Lett*. 527:255-262.

Hynes, R.O. 2007. Cell-matrix adhesion in vascular development. *J Thromb Haemost*. 5 Suppl 1:32-40.

Kalatskaya, I., Y.A. Berchiche, S. Gravel, B.J. Limberg, J.S. Rosenbaum, and N. Heveker. 2009. AMD3100 is a CXCR7 ligand with allosteric agonist properties. *Mol Pharmacol*. 75:1240-1247.

Kortesmaa, J., P. Yurchenco, and K. Tryggvason. 2000. Recombinant laminin-8 (alpha(4)beta(1)gamma(1)). Production, purification, and interactions with integrins. *J Biol Chem*. 275:14853-14859.

Lee, T.H., S. Seng, H. Li, S.J. Kennel, H.K. Avraham, and S. Avraham. 2006. Integrin regulation by vascular endothelial growth factor in human brain microvascular endothelial cells: role of alpha6beta1 integrin in angiogenesis. *J Biol Chem*. 281:40450-40460.

Mavria, G., Y. Vercoulen, M. Yeo, H. Paterson, M. Karasarides, R. Marais, D. Bird, and C.J. Marshall. 2006. ERK-MAPK signaling opposes Rho-kinase to promote endothelial cell survival and sprouting during angiogenesis. *Cancer Cell*. 9:33-44.

Miner, J.H., J. Cunningham, and J.R. Sanes. 1998. Roles for laminin in embryogenesis: exencephaly, syndactyly, and placentopathy in mice lacking the laminin alpha5 chain. *J Cell Biol*. 143:1713-1723.

Murphy, P.A., S. Begum, and R.O. Hynes. 2015. Tumor angiogenesis in the absence of fibronectin or its cognate integrin receptors. *PLoS One*. 10:e0120872.

Xu et al

- Nagasawa, T. 2014. CXC chemokine ligand 12 (CXCL12) and its receptor CXCR4. *J Mol Med (Berl)*. 92:433-439.
- Nakatsu, M.N., and C.C. Hughes. 2008. An optimized three-dimensional in vitro model for the analysis of angiogenesis. *Methods Enzymol*. 443:65-82.
- Nakatsu, M.N., R.C. Sainson, J.N. Aoto, K.L. Taylor, M. Aitkenhead, S. Perez-del-Pulgar, P.M. Carpenter, and C.C. Hughes. 2003. Angiogenic sprouting and capillary lumen formation modeled by human umbilical vein endothelial cells (HUVEC) in fibrin gels: the role of fibroblasts and Angiopoietin-1. *Microvasc Res*. 66:102-112.
- Primo, L., G. Seano, C. Roca, F. Maione, P.A. Gagliardi, R. Sessa, M. Martinelli, E. Giraudo, L. di Blasio, and F. Bussolino. 2010. Increased expression of alpha6 integrin in endothelial cells unveils a proangiogenic role for basement membrane. *Cancer Res*. 70:5759-5769.
- Quan, C., M.K. Cho, Y. Shao, L.E. Mianeki, E. Liao, D. Perry, and T. Quan. 2015. Dermal fibroblast expression of stromal cell-derived factor-1 (SDF-1) promotes epidermal keratinocyte proliferation in normal and diseased skin. *Protein Cell*. 6:890-903.
- Salcedo, R., and J.J. Oppenheim. 2003. Role of chemokines in angiogenesis: CXCL12/SDF-1 and CXCR4 interaction, a key regulator of endothelial cell responses. *Microcirculation*. 10:359-370.
- Salvucci, O., L. Yao, S. Villalba, A. Sajewicz, S. Pittaluga, and G. Tosato. 2002. Regulation of endothelial cell branching morphogenesis by endogenous chemokine stromal-derived factor-1. *Blood*. 99:2703-2711.
- Samarelli, A.V., E. Riccitelli, L. Bizzozero, T.N. Silveira, G. Seano, M. Pergolizzi, G. Vitagliano, I. Cascone, G. Carpentier, A. Bottos, L. Primo, F. Bussolino, and M. Arese. 2014. Neuroligin 1 induces blood vessel maturation by cooperating with the alpha6 integrin. *J Biol Chem*. 289:19466-19476.
- Senger, D.R., and G.E. Davis. 2011. Angiogenesis. *Cold Spring Harb Perspect Biol*. 3:a005090.
- Song, J., X. Zhang, K. Buscher, Y. Wang, H. Wang, J. Di Russo, L. Li, S. Lutke-Enking, A. Zarbock, A. Stadtmann, P. Striewski, B. Wirth, I. Kuzmanov, H. Wiendl, D. Schulte, D. Vestweber, and L. Sorokin. 2017. Endothelial Basement Membrane Laminin 511 Contributes to Endothelial Junctional Tightness and Thereby Inhibits Leukocyte Transmigration. *Cell Rep*. 18:1256-1269.
- Stenzel, D., C.A. Franco, S. Estrach, A. Mettouchi, D. Sauvaget, I. Rosewell, A. Schertel, H. Armer, A. Domogatskaya, S. Rodin, K. Tryggvason, L. Collinson, L. Sorokin, and H. Gerhardt. 2011. Endothelial basement membrane limits tip cell formation by inducing Dll4/Notch signalling in vivo. *EMBO Rep*. 12:1135-1143.

Xu et al

- Strasser, G.A., J.S. Kaminker, and M. Tessier-Lavigne. 2010. Microarray analysis of retinal endothelial tip cells identifies CXCR4 as a mediator of tip cell morphology and branching. *Blood*. 115:5102-5110.
- Streuli, C.H., and N. Akhtar. 2009. Signal co-operation between integrins and other receptor systems. *Biochem J*. 418:491-506.
- Tachibana, K., S. Hirota, H. Iizasa, H. Yoshida, K. Kawabata, Y. Kataoka, Y. Kitamura, K. Matsushima, N. Yoshida, S. Nishikawa, T. Kishimoto, and T. Nagasawa. 1998. The chemokine receptor CXCR4 is essential for vascularization of the gastrointestinal tract. *Nature*. 393:591-594.
- Thyboll, J., J. Kortessmaa, R. Cao, R. Soininen, L. Wang, A. Iivanainen, L. Sorokin, M. Risling, Y. Cao, and K. Tryggvason. 2002. Deletion of the laminin alpha4 chain leads to impaired microvessel maturation. *Mol Cell Biol*. 22:1194-1202.
- Turner, C.J., K. Badu-Nkansah, and R.O. Hynes. 2017. Endothelium-derived fibronectin regulates neonatal vascular morphogenesis in an autocrine fashion. *Angiogenesis*. 20:519-531.
- Unoki, N., T. Murakami, K. Nishijima, K. Ogino, N. van Rooijen, and N. Yoshimura. 2010. SDF-1/CXCR4 contributes to the activation of tip cells and microglia in retinal angiogenesis. *Invest Ophthalmol Vis Sci*. 51:3362-3371.
- Yurchenco, P.D. 2011. Basement membranes: cell scaffoldings and signaling platforms. *Cold Spring Harb Perspect Biol*. 3.

## Figure Legends

### Figure 1. Laminin-411 and laminin-511 regulate endothelial tubular morphogenesis

**(A-B)** Endothelial basement membrane components are expressed in co-culture. Immunofluorescence staining of 3-day planar co-cultures **(A)** or 6-day bead sprouts **(B)** shows endothelial expression of the laminin  $\alpha 4$  (LM- $\alpha 4$ ) and  $\alpha 5$  (LM- $\alpha 5$ ) chains, the laminin (LM)  $\beta 1$  and  $\gamma 1$  chains, as well as COL IV. Scale bar = 50  $\mu$ m and 100  $\mu$ m respectively. **(C-I)** Depletion of either the LM- $\alpha 4$  or LM- $\alpha 5$  chain inhibits endothelial morphogenesis. **(C-D)** The efficiency of siRNA-mediated knockdown of the LM- $\alpha 4$  chain **(C)** and LM- $\alpha 5$  chain **(D)** in endothelial cells used in functional studies was assayed by qPCR for each of the three independent experiments and plotted as the mean  $\pm$  s.d. **(E)** Representative images of RFP-expressing endothelial cells at day 2 of planar co-culture depleted of either the LM- $\alpha 4$  or LM- $\alpha 5$  chain compared to control. Scale = 100  $\mu$ m. **(F)** Quantitation of endothelial cord length at day 2 for the different conditions. Plotted is length of endothelial cords measured from 10 random fields in 3 independent experiments. Data was analyzed by one-way ANOVA and plotted as the mean length  $\pm$  s.d. **(G)** Representative images of endothelial cells depleted of either the Lm  $\alpha 4$  or  $\alpha 5$  chain in a 5-day bead sprout assay showing decreased sprout length and sprouts number per bead compared to control. Arrows indicate examples of sprouts. Scale = 250  $\mu$ m. **(H-I)** Quantitation of number of sprouts **(H)** or sprout length **(I)** from 6-8 beads in each of 10 randomly selected fields in 3 independent experiments. Plotted are the **(H)** number of sprouts on individual beads or **(I)** the length of individual sprouts **(I)**. Data was analyzed by one-way ANOVA. The mean  $\pm$  s.d. is indicated.

### Figure 2. Depletion of endothelial $\alpha 6$ integrins inhibits endothelial tubulogenesis. **(A)**

Immunofluorescence staining of 2-day planar co-cultures indicating the endothelial expression of  $\alpha 6$  integrins. **(B)** Alpha-6 integrins were depleted in endothelial cells by shRNA and the effects were assayed in 3 independent experiments. Efficiency of knockdown was assayed by western blot (left panel) Statistical analysis was performed with a two-tailed Student's t-test. The mean  $\pm$  s.d is indicated. The effect of  $\alpha 6$  depletion on cord/tube length in planar co-culture was assayed every 2 days for 10 days and compared to control. Cord/tube length was quantified in three independent experiments. Plotted with the length of individual cords/tubes with each experiment represent by a different color (middle panel). Representative images are shown from the 6-day co-cultures (right panel). Scale = 100  $\mu$ m. **(C)** Similar effects of  $\alpha 6$  knockdown were observed in bead sprout assays (left panel). Efficiency of  $\alpha 6$  knockdown was determined by

Xu et al

western blot. Statistical analysis was performed using a two-tailed Student's t-test. The mean  $\pm$  s.d. is indicated (left panel). Sprout length was measured every 2 days for 8 days. Plotted is the length of individual sprouts from 3 independent experiments with each experiment represented by a different color. Representative images of 8-day bead sprouts assays are shown in the Left Panel. Scale = 500  $\mu$ m. \* $p \leq 0.05$ , \*\* $p \leq 0.01$ .

**Figure 3. Depletion of  $\alpha 6$  integrins from established endothelial tubes disrupts tube integrity and inhibits the expression of laminin-511. (A-B)** Depleting endothelial tubes of  $\alpha 6$  integrins inhibits tube stability. Endothelial tubes were formed for 10 days in the planar co-culture assay and the expression of  $\alpha 6$  or non-targeting shRNA was induced with doxycycline. **(A)** Representative images of endothelial tubes after 8 and 12 days of induction of either the  $\alpha 6$  or non-targeting (NT) shRNA. **(B)** The disruption of endothelial tubes resulted in altered morphology best characterized by an increase in the width of the resulting endothelial structures. Plotted is the average width of individual tubes/field (NT-shRNA) and endothelial structures ( $\alpha 6$ -shRNA) measured from ten randomly selected fields in two independent experiments.  $n=22$ . Student's t was used to compare conditions. The mean  $\pm$  s.d. is indicated. \*\*\* $p \leq 0.001$ . **(C)** Comparison of laminin-411 and laminin-511 in endothelial tubes after the depletion of  $\alpha 6$  integrins. The depletion of  $\alpha 6$  integrins from stable endothelial tubes was performed as described above. Both endothelial laminins are expressed by stable endothelial tubes as shown in the NT control. Depletion of  $\alpha 6$  resulted in the loss of laminin-511, but not laminin-411. Scale = 50  $\mu$ m.

**Figure 4. The expression of the CXCR4 and ANGPT2 genes are positively regulated by  $\alpha 6$  integrins and laminin-511. (A-B)** RNA was isolated from 6-day bead sprouts and analyzed by qPCR. **(A)** Shown is the efficiency of  $\alpha 6$  depletion and the effects of  $\alpha 6$  depletion on the expression of the LM- $\alpha 4$ , LM- $\alpha 5$ , CXCR4 and ANGPT2 normalized to non-targeting control. **(B)** Shown is the efficiency of depletion of the LM- $\alpha 4$  chain and the effects of this depletion of the expression of CXCR4 and ANGPT2. **(C)** Shown is the efficiency of depletion of the LM- $\alpha 5$  chain and the effects of this depletion of the expression of CXCR4 and ANGPT2.  $n = 3$ , \*\* $p \leq 0.01$ , \*\*\* $p \leq 0.001$ , \*\*\*\* $p \leq 0.0001$ .

**Figure 5. Pharmacological inhibition of the CXCR4 receptor inhibits endothelial tubular morphogenesis organotypic culture. (A)** The dose-dependent reduction in the number of endothelial sprouts, as well as sprout length in 6-day bead sprout assays in response to the

Xu et al

CXCR4 inhibitor, AMD3100. Left panel - Plotted is the number of sprouts on individual beads from 3 fields containing 7-10 beads from each of two independent experiments. The mean and s.d. are indicated. Right panel- Plotted is the length of individual sprouts on these same beads **(B)** AMD3100 inhibition of CXCR4 in 6-day planar co-culture causes defective morphogenesis in a dose-dependent manner. Representative images are shown in the Right Panel. Scale = 100  $\mu$ m. Left Panel- Plotted is the average length of cords/tubes fields. Six fields were analyzed in each of two independent experiments. The mean  $\pm$  s.d. is indicated. One-way ANOVA was used to compare sprouts or tube lengths.  $**p \leq 0.01$ ,  $***p \leq 0.001$   $****p \leq 0.0001$ .



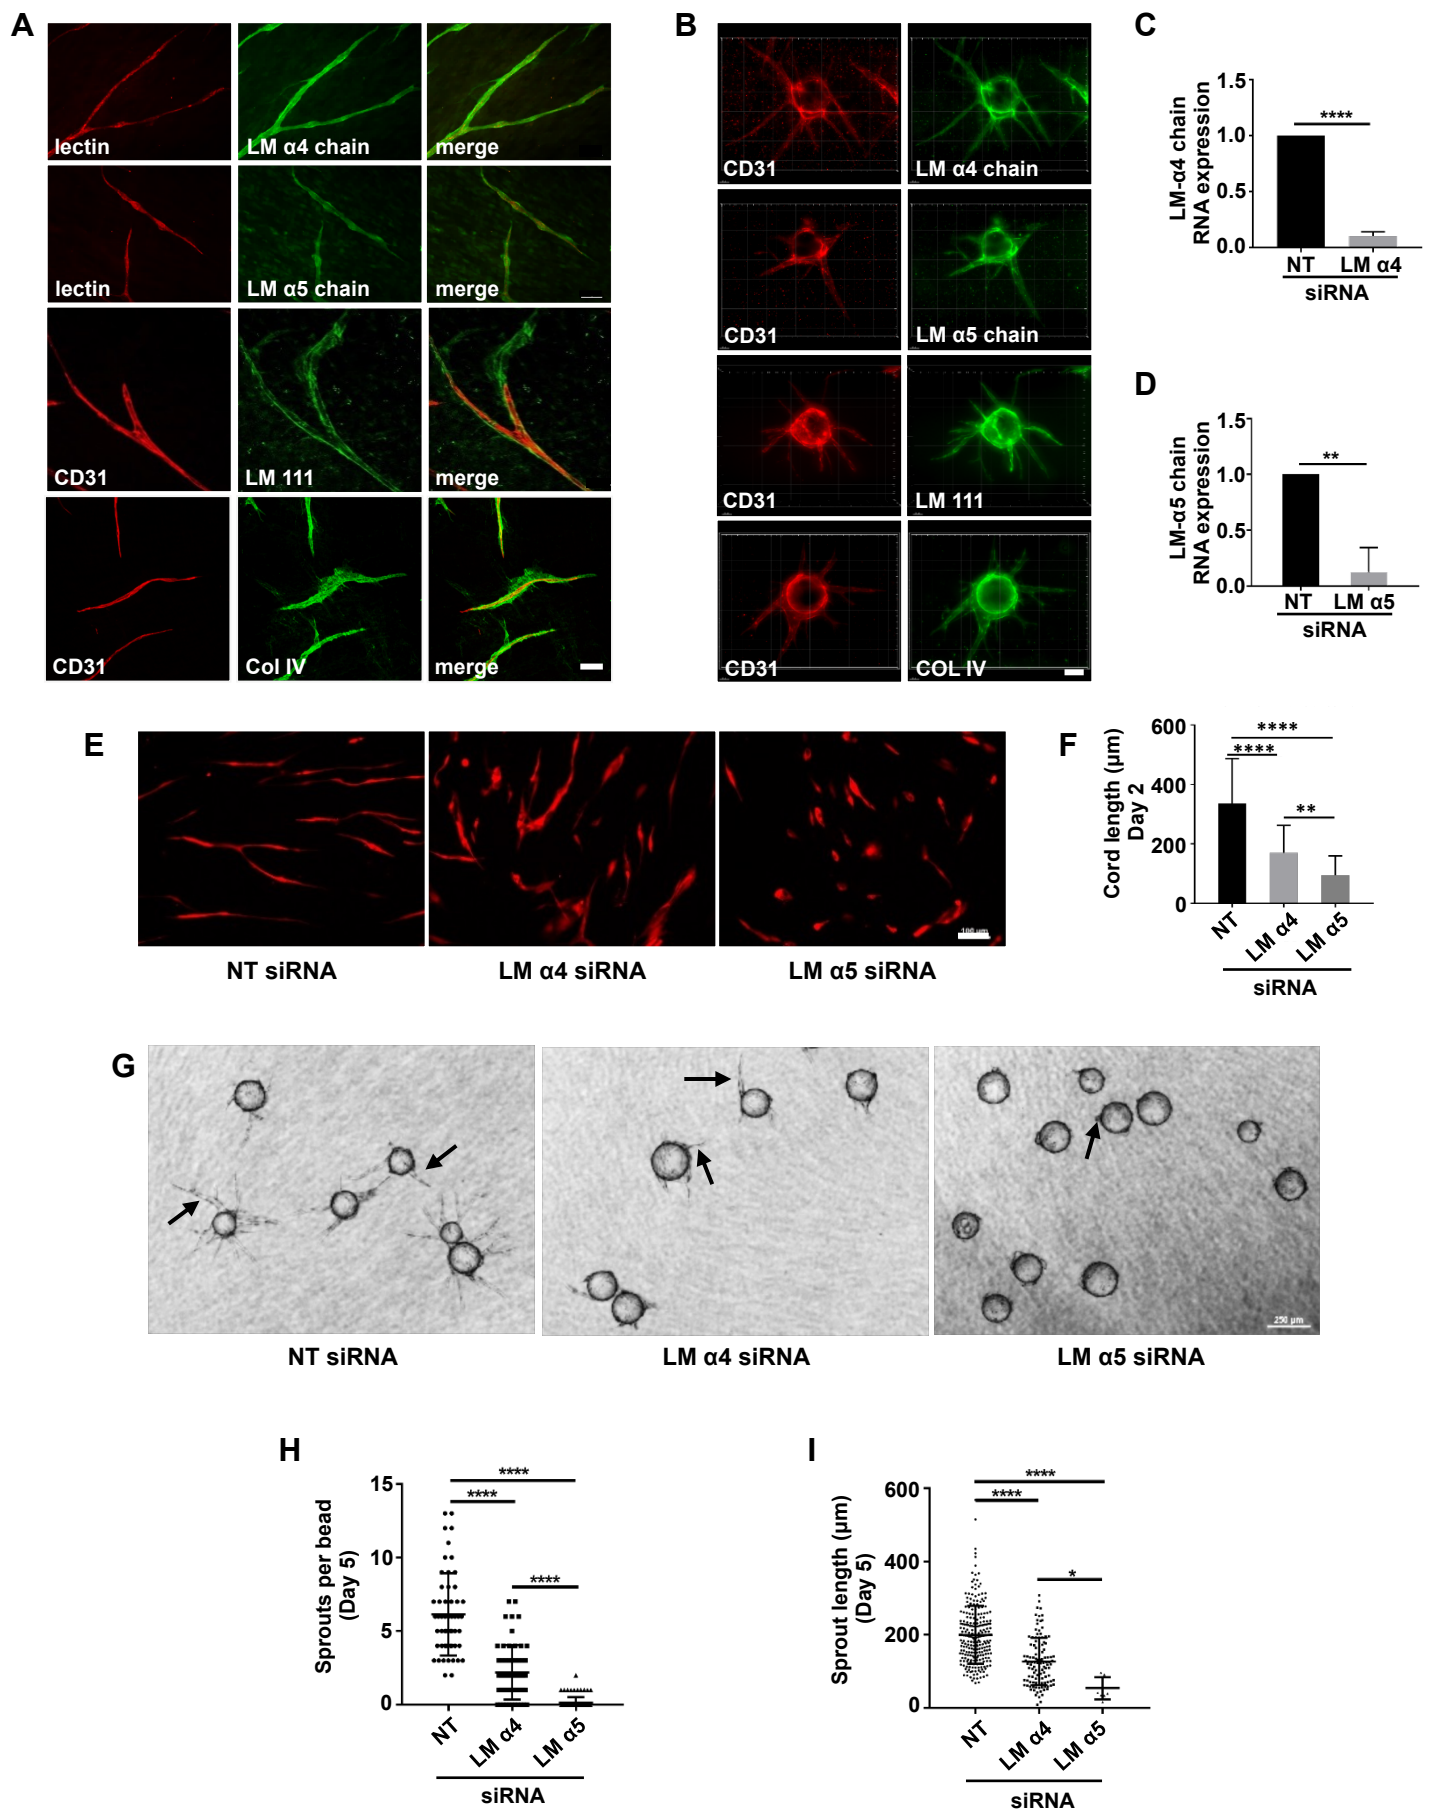

**Figure 1**

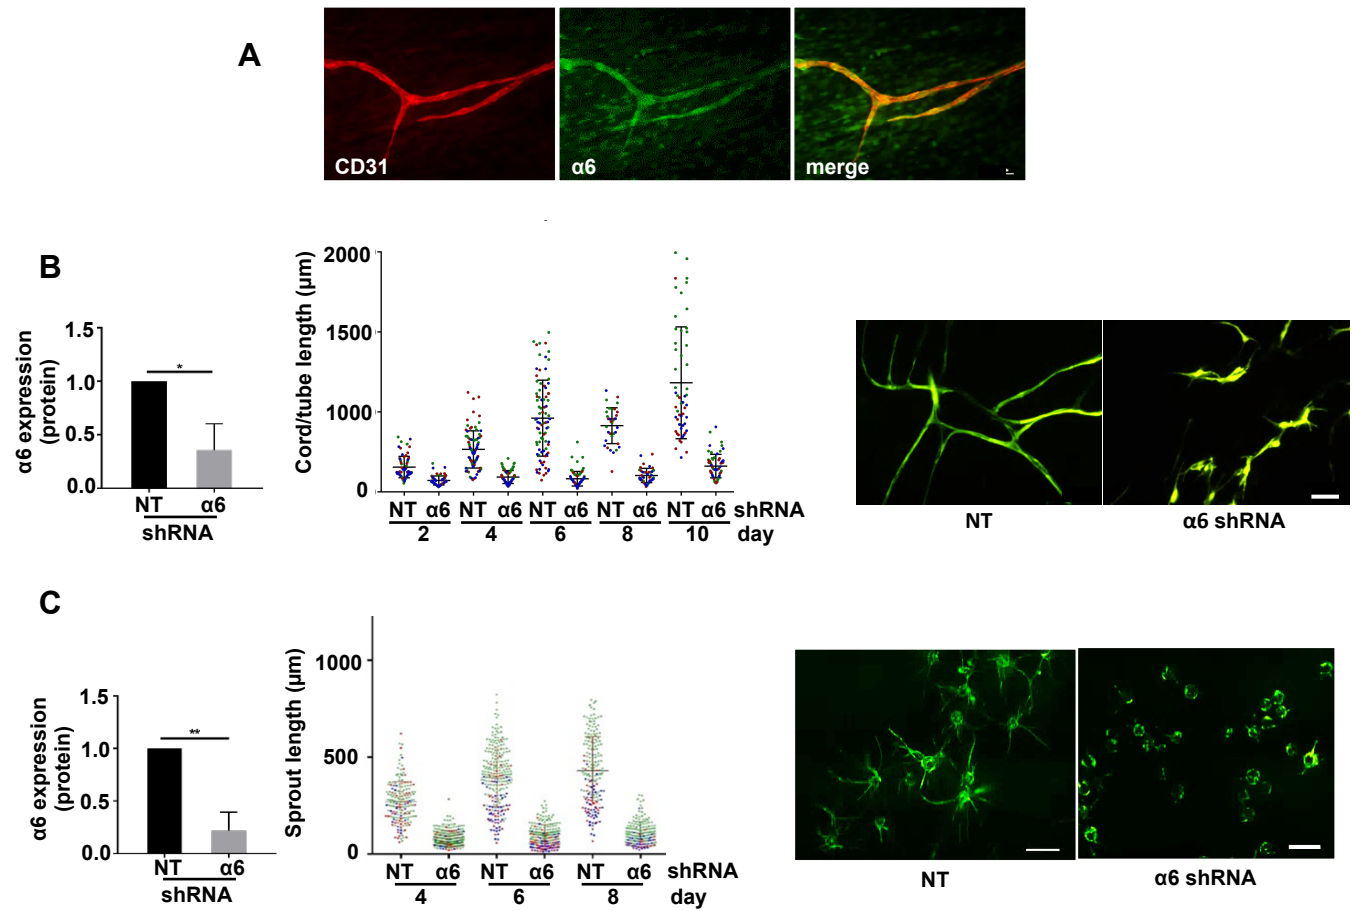

**Figure 2**



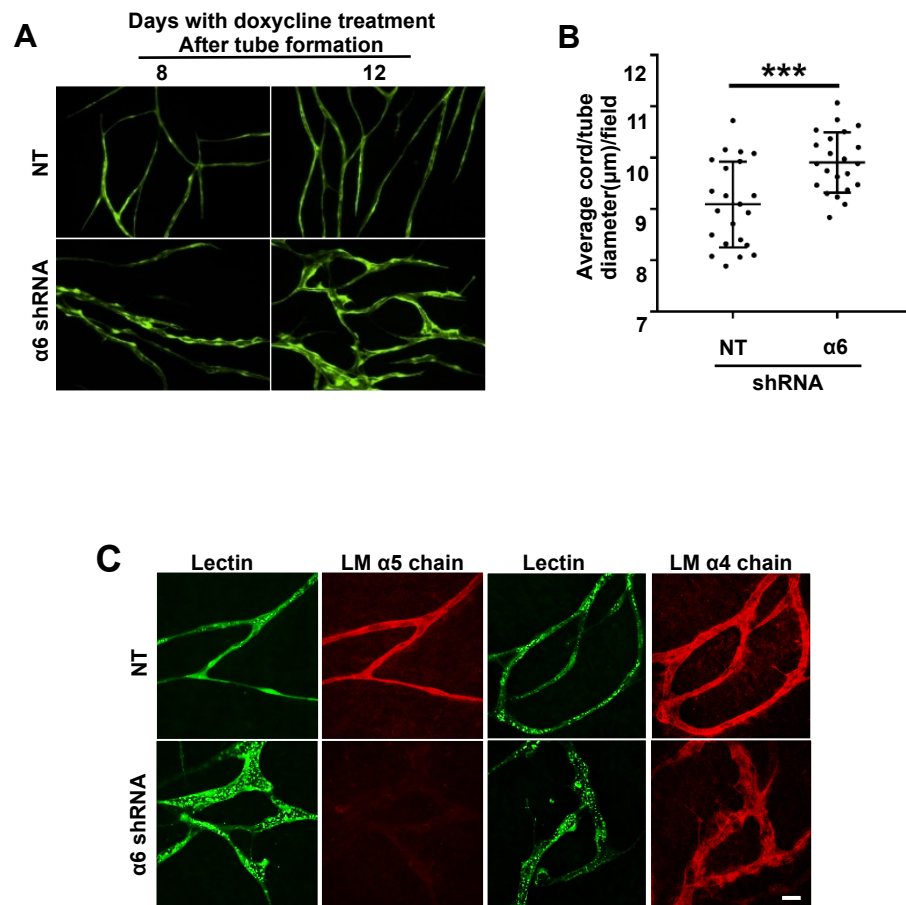

Figure 3

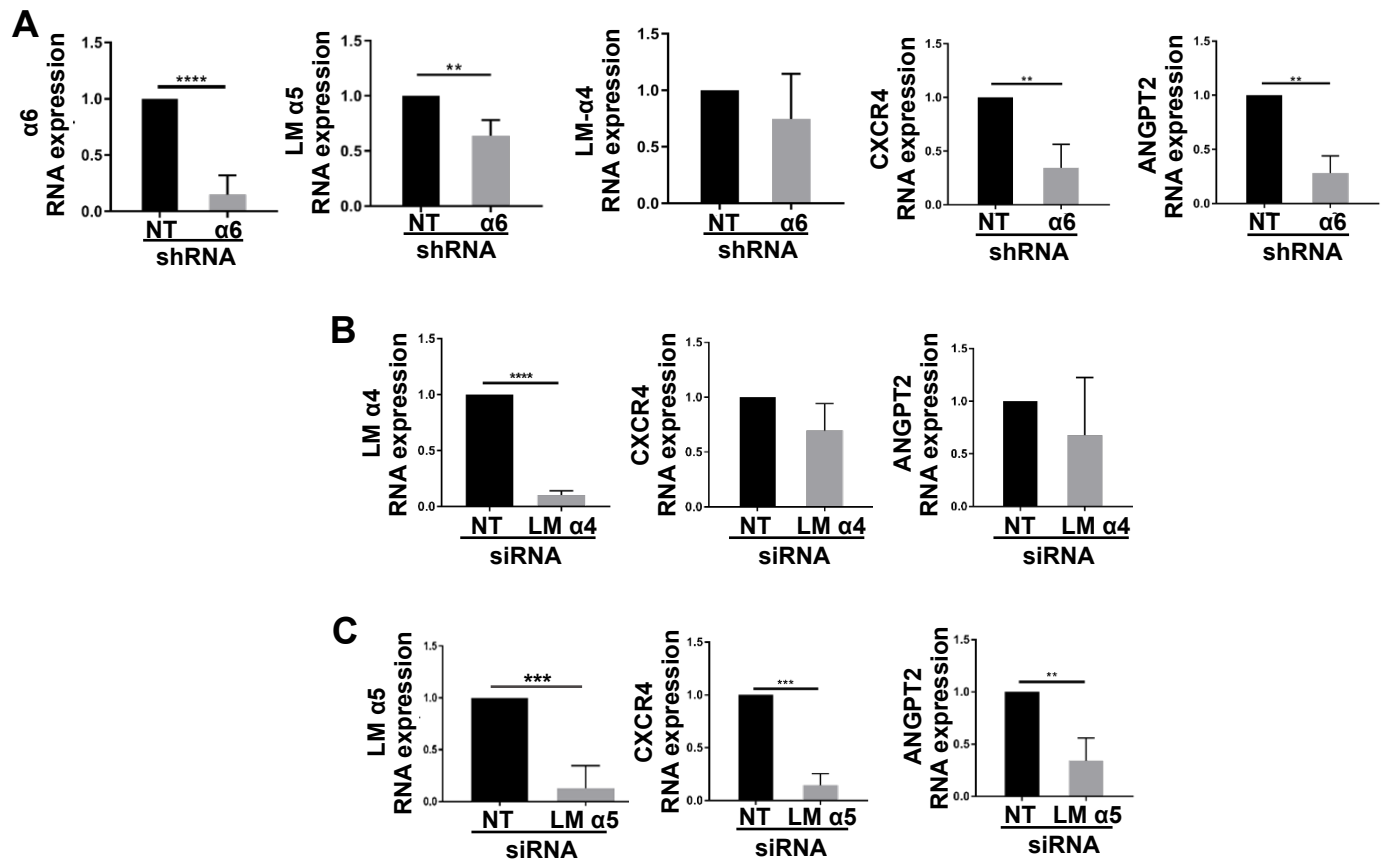

**Figure 4**

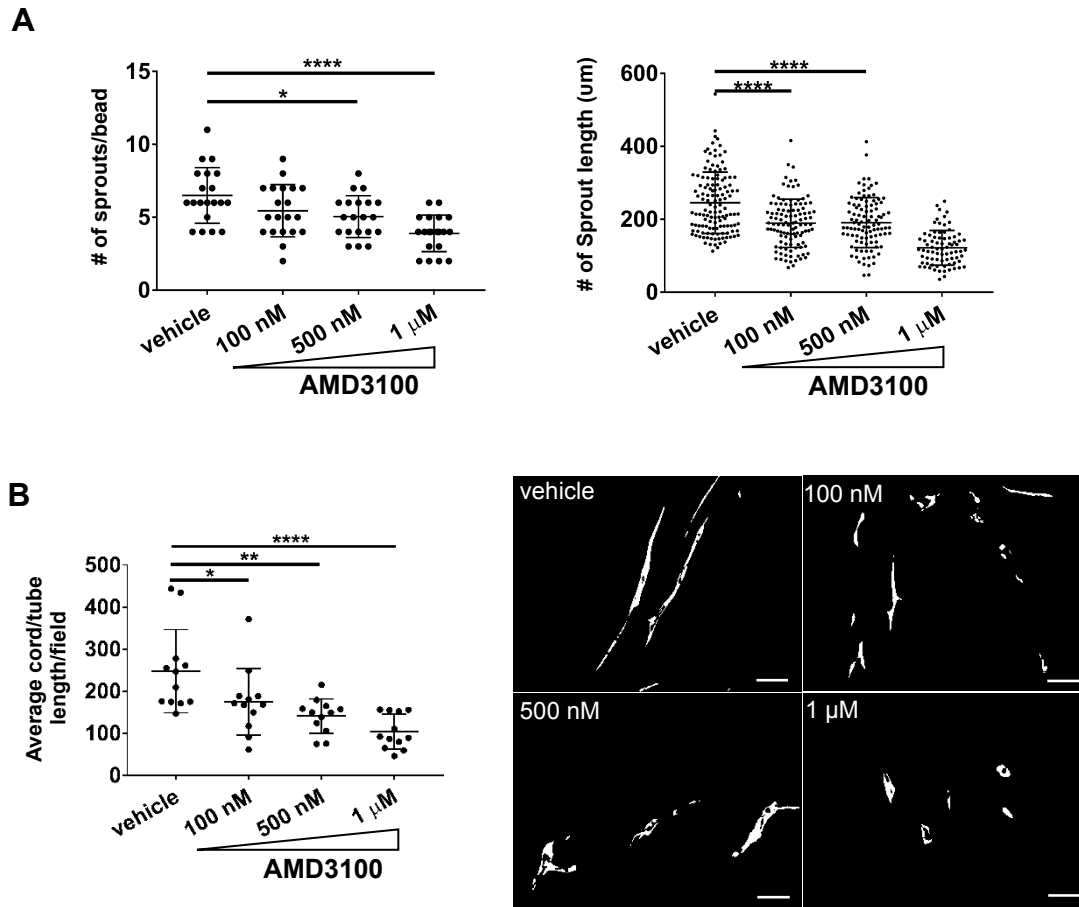

**Figure 5**

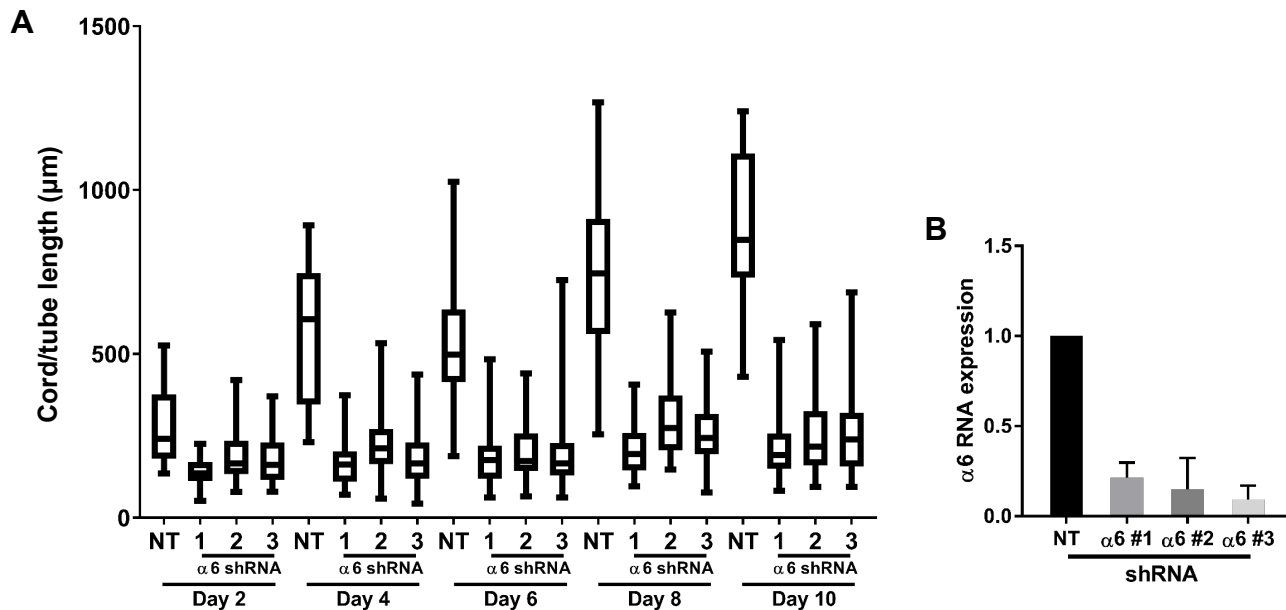

**Supplemental Figure 1. (A)** Depletion of endothelial  $\alpha 6$  integrins using 3 independent shRNA targeting sequences shows similar inhibition of tubular morphogenesis compared to control. Cord/tube lengths were collected from 10 randomly selected fields in 3 independent experiments. **(B)** Knockdown of  $\alpha 6$  was confirmed using qPCR. Mean RNA expression is from 3 independent experiments. Alpha 6 targeting sequence 2 was used in Figures 2, 3, and 4 of main text.

**A** Gene expression in  $\alpha 6$  integrin depleted sprouts

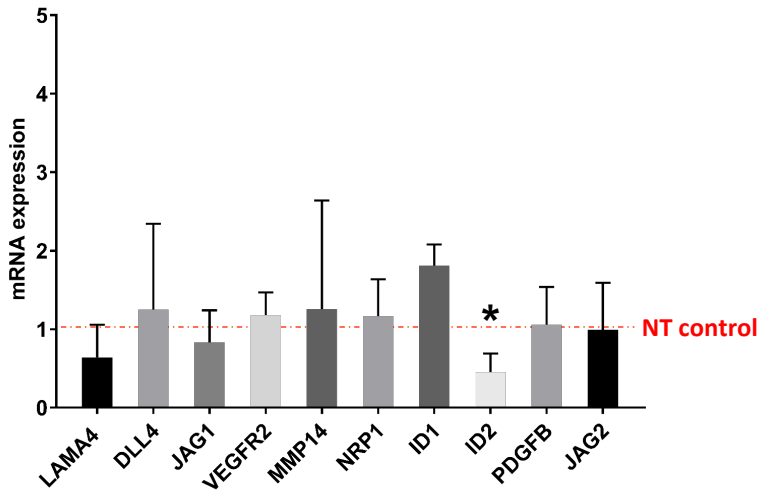

**B** Gene expression in LM-511 depleted sprouts

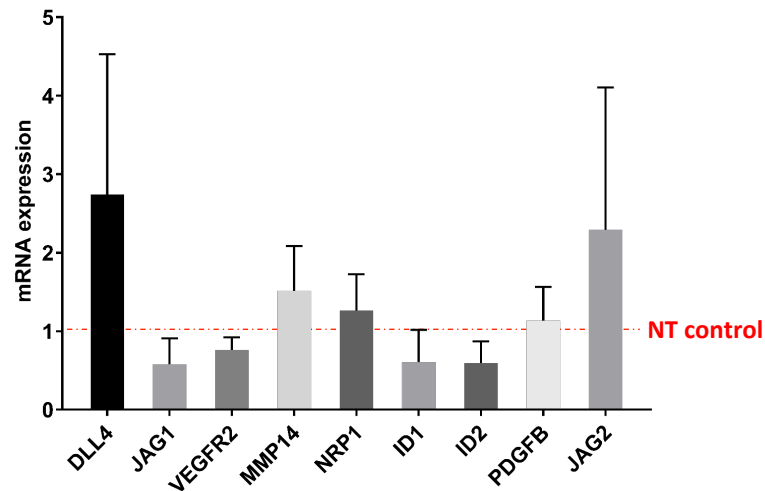

**C** Gene expression in LM-411 depleted sprouts

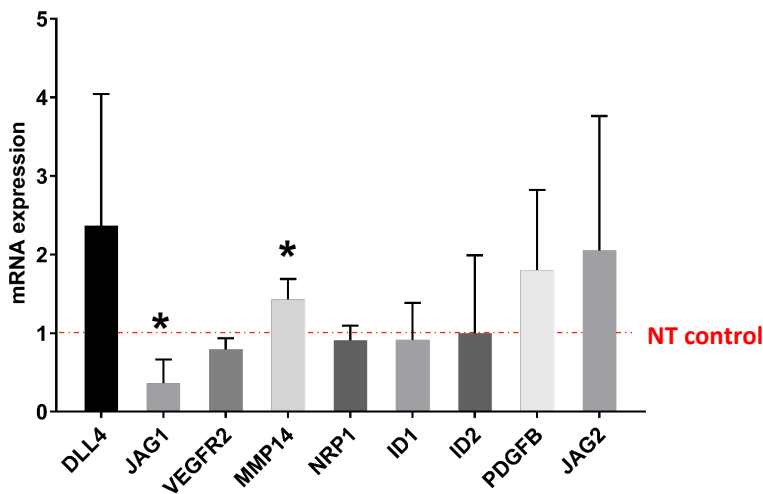

**Supplemental Figure 2.** Expression of angiogenesis-associated genes in 5-day bead sprout assay compared to control (A) alpha 6 integrin-depleted endothelial cells (B) laminin-511-depleted endothelial cells and (C) laminin-411-depleted endothelial cells were measured by qPCR. Data are plotted as the mean  $\pm$  s.d. from 3 independent experiments. Expression of each gene was compared to NT control using two-way Student's T-test. \* $p \leq 0.05$ .
